# Supplementary material for: Patients' preferences for supportive care services in fully managed wards following colorectal cancer surgery: A discrete choice experiment
Source: Research Square preprint supplement (doi:10.21203/rs.3.rs-8402037/v1), 2026-02-03
Supplement: Supplementary file 1 [file 0d3236603f8a8ccbbf31de68.docx]

**Supplementary Material 1**

General information on supportive service needs of patients in the literature

| **Author/Year** | **Country** | **Research type** | **Research object** | **Sample size** | **Related attributes and levels** |
| --- | --- | --- | --- | --- | --- |
| ‌Zhu Chaoying  2012 | China | Qualitative research | Postoperative colorectal  cancer patients | 22 | 1. Demands: Specialized care requirements for ostomy, information support need, pain management need   2.Demand providers: responsible nurses, stoma specialist nurses  3.Method of demand satisfaction: face-to-face communication between nurses and patients |
| Danielsen  2013 | Danmark | Qualitative research | Hospitalized patient with enterostomy | 15 | 1.Demands: Psychological needs, knowledge of ostomy care  2.Demands providers:Nurses, patients |
| Sutton  2019 | United Kingdom‌ | Qualitative research | Postoperative colorectal cancer patients | 27 | 1.Demands:Ostomy care needs, management of sleep disorders, knowledge of wound care and psychological support needs  2.Demand providers: Nurses, doctors |
| Yu Yafen  2021 | China | Randomized controlled trial‌ | Hospitalized patient with enterostomy | 127 | 1.Demands: Information support need, ostomy care need  2.Demand providers: Ostomy specialist nurses, responsible nurses |
| Shen Xuefang  2021 | China | Randomized controlled trial‌ | Perioperative colorectal cancer patients | 126 | 1.Demands: Symptom management need, pipeline care need  2.Demand providers: Nurse  3.Intervention method: Face-to-face communication |
| Husban  2021 | Jordan | ‌Quantitative research | Postoperative colorectal cancer patients | 200 | 1.Demands: Abdominal distension management, psychological support, treatment knowledge  2.Demand providers: Nurses, Doctors |
| Lu Lingling  2022 | China | Randomized controlled trial‌ | Hospitalized patient with enterostomy | 86 | 1.Demands : Ostomy care needs, psychological support needs  2.Demand providers: Family members, fellow patients, nurses  3.Demand intervention methods: Nurse-patient communication |
| Chen Jie  2023 | China | Qualitative research | Postoperative colorectal cancer patients | 21 | 1.Demands: Dietary guidance need, nutrition tube care need  2.Demand providers: Nurses, Doctors |
| Xu Xiang  2021 | China | Qualitative research | Leukemia patients | 11 | 1.Demands: Family visitation needs |
| Tang Jing  2018 | China | ‌Quantitative research | Coronary heart disease patient | 102 | 1.Demands:Safety needs(preventing falls and bed falls), family member companionship requirements |
| He Qiaoling  2018 | China | Qualitative research | Poisoning suicide patients | 10 | 1.Demands:Family companionship needs, Family visitation needs |
| Wan Donghong  2012 | China | Qualitative research | Elderly patients | 11 | 1.Demands: Quality assurance need for caregivers, family visitation need, infusion care, mobility care , safety assurance need  2. Safety assurance personnel: Nurses, caregivers  3. Self-payment for caregiver fees: No  4. Quality assurance of caregiver services: Hospital |
| Zhao Lifeng  2011 | China | ‌Quantitative research | Inpatient | 112 | 1.Demands:Dietary care needs, excretion care needs, intravenous infusion care needs, family visitation needs |
| Li Li  2011 | China | Qualitative research | Inpatient | 9 | 1.Demands: Intravenous infusion care needs, family member companionship needs  2.Demand provider: Nurse |

**Supplementary Material 2.**

Information on patients undergoing radical surgery for colorectal cancer（N=27）

| **Serial number** | **Gender** | **Age**  **(Year)** | **Educational background** | **Vocational type** | **Marital status** | **Residence** | **Tumor site** | **Tumor stage** | **Ostomy** |
| --- | --- | --- | --- | --- | --- | --- | --- | --- | --- |
| P1 | Male | 58 | Master | Professoriat | Married | City | Rectum | III | Have |
| P2 | Male | 81 | Junior school | Peasant | Widowed | Town | Rectum | II | Have |
| P3 | Male | 50 | Senior school | Engine driver | Married | Town | Transverse colon | IV | None |
| P4 | Female | 56 | Junior school | Peasant | Married | Village | Rectum | IV | None |
| P5 | Male | 71 | Junior school | Retirees | Married | Town | Rectum | III | Have |
| P6 | Female | 69 | Junior school | Retirees | Married | City | Transverse colon | IV | None |
| P7 | Male | 46 | Senior school | Salesperson | Married | Town | Rectum | II | Have |
| P8 | Male | 67 | Junior school | Peasant | Married | Village | Sigmoid flexure | II | None |
| P9 | Male | 52 | Junior school | Businessman | Married | Town | Rectum | III | Have |
| P10 | Female | 56 | Senior school | Retirees | Married | Village | Transverse colon | II | None |
| P11 | Female | 56 | Junior school | Peasant | Married | Village | Sigmoid flexure | I | None |
| P12 | Female | 62 | Senior school | Retirees | Married | Town | Transverse colon | II | None |
| P13 | Male | 77 | Primary school | Peasant | Widowed | Village | Rectum | II | None |
| P14 | Male | 55 | Junior school | Cementer | Married | Village | Sigmoid flexure | III | None |
| P15 | Male | 45 | Junior school | Freeman | Married | Village | Rectum | III | None |
| P16 | Male | 64 | Junior school | Freeman | Married | Town | Rectum | II | None |
| P17 | Female | 55 | Junior school | Freeman | Married | Town | Rectum | III | Have |
| P18 | Female | 75 | Primary school | Freeman | Widowed | Town | Transverse colon | III | None |
| P19 | Female | 55 | Junior school | Businessman | Married | Town | Sigmoid flexure | II | None |
| P20 | Male | 69 | Junior school | Peasant | Widowed | Village | Rectum | IV | None |
| P21 | Male | 56 | Junior school | Peasant | Married | Village | Rectum | II | None |
| P22 | Male | 49 | Junior school | Builders | Married | Town | Rectum | III | None |
| P23 | Male | 23 | Senior school | Businessman | Single | City | Rectum | II | None |
| P24 | Male | 61 | Senior school | Retirees | Married | Town | Rectum | III | Have |
| P25 | Female | 57 | Junior school | Businessman | Remarried | Town | Rectum | III | Have |
| P26 | Male | 58 | Senior school | Office staff | Married | City | Rectum | II | Have |
| P27 | Female | 70 | Junior school | Freeman | Widowed | Village | Rectum | II | Have |

**Supplementary Material 3**

The integration process and results of literature research and qualitative interview

| **Literature Search 1*** | | **Literature Search 2**** | | **Qualitative interview** | | **Integrated results** | |
| --- | --- | --- | --- | --- | --- | --- | --- |
| **Attribute** | **Level** | **Attribute** | **Level** | **Attribute** | **Level** | **Attribute** | **Level** |
| Providers of specialized nursing needs | General nurse  Specialist nurse | None | None | None | None | Providers of specialized nursing needs | General nurse  Specialist nurse |
| Psychological support provider | Medical staff  Patients  Family members | None | None | None | None | Psychological support provider | Medical staff  Patients  Family members |
| Information support providers | Nurse  Doctors and nurses | None | None | None | None | Information support providers | Nurse  Doctors and nurses |
| Form of information support | Face-to-face communication  Paper materials | None | None | Form of information support | Paper materials  video | Form of information support | Face-to-face communication  Paper materials  video |
| None | None | Providers of basic nursing services | Nurse  Nursing assistant | Providers of basic nursing services | Nurse  Nursing assistant  Nurses and nursing assistants | Providers of  basic nursing  services | Nurse  Nursing assistant  Nurses and nursing assistants |
| None | None | Family  visitation needs | None | Frequency of family visits | Once every two to three days  Twice a day  Three times or more a day | Frequency of family visits | Once every two to three days  Twice a day  Three times or more a day |
| None | None | family companionship | None | Duration of family visitation | <1 hour per time  1 to 2 hours per time  2 to 3 hours per time | Duration of family visitation | <1 hour per time  1 to 2 hours per time  2 to 3 hours per tim**e** |
| None | None | None | None | Caregiver-to-  patient ratio | One-to-one  One-to-two  One-to-three | Caregiver-to-  patient ratio | One-to-one  One-to-two  One-to-three |
| None | None | Cost of self-  paid nursing  assistants  (yuan/day) | None | Cost of self-paid nursing assistants  (yuan/day) | 50~80yuan/day  80~100yuan/day  130~150yuan/day | Cost of self-paid nursing assistants(yuan/  day) | 50~80yuan/day  80~100yuan/day  130~150yuan/day |
| None | None | Caregiver service quality assurance | Hospital | Caregiver service quality assurance | Hospital  Labor srevice  Either hospital  or labor service company  Hospital and Labor service company | Caregiver service quality assurance | Hospital  Either hospital or Labor service companyc  Hospital and Labor service company |
| None | None | Safety assurance personnel | Nurse  Nursing assistant | None | None | Safety assurance personnel | Nurse  Nursing assistant |

Note: Literature search 1* represents the attributes and levels of supportive service needs formed for patients undergoing radical resection for colorectal cancer;

Literature search 2** represents the attributes and levels of supportive service needs formed for patients in the full management ward.

**Supplementary Material 4.**

Expert general information（N=17）

| **Number** | **Gender** | **Age**  **(Years)** | **Education Degree** | **Work Experience**  **(Years)** | **Professional Title** | **Current Position** |
| --- | --- | --- | --- | --- | --- | --- |
| 1 | Male | 42 | Master's degree | 14 | Associate Chief Physician | Clinical medicine |
| 2 | Female | 54 | Master's degree | 33 | Deputy Chief Nurse | Nursing Management |
| 3 | Female | 37 | Master's degree | 15 | Deputy Chief Nurse | Clinical Nursing |
| 4 | Female | 57 | Bachelor degree | 35 | Deputy Chief Nurse | Clinical Nursing |
| 5 | Female | 53 | Master's degree | 34 | Senior Chief Nurse | Nursing Management |
| 6 | Female | 45 | Bachelor degree | 24 | Deputy Chief Nurse | Clinical Nursing |
| 7 | Female | 42 | Master's degree | 17 | Senior Chief Nurse | Nursing Management |
| 8 | Female | 34 | Bachelor degree | 14 | Deputy Chief Nurse | Clinical Nursing |
| 9 | Male | 43 | Master's degree | 18 | Senior Chief Nurse | Clinical medicine |
| 10 | Male | 45 | Master's degree | 20 | Senior Chief Nurse | Clinical medicine |
| 11 | Female | 45 | Bachelor degree | 27 | Deputy Chief Nurse | Clinical Nursing |
| 12 | Female | 46 | Bachelor degree | 24 | Deputy Chief Nurse | Clinical Nursing |
| 13 | Female | 46 | Bachelor degree | 22 | Deputy Chief Nurse | Clinical Nursing |
| 14 | Female | 43 | Master's degree | 20 | Senior Chief Nurse | Nursing Management |
| 15 | Female | 37 | Master's degree | 11 | Deputy Chief Nurse | Clinical Nursing |
| 16 | Female | 44 | Bachelor degree | 20 | Deputy Chief Nurse | Clinical Nursing |
| 17 | Female | 44 | Doctor | 15 | Professor | Teaching and Research |

**Supplementary Material 5.**

Revised preferences of patients undergoing radical surgery for colorectal cancer for unaccompanied supportive service needs

| **Attribute** | **Level** | **Level Description** |
| --- | --- | --- |
| 1.Form of information support | 1-1Face-to-face communication between nurses and patients | The nurse provides information support to the patient through face-to-face communication (such as ostomy care, dietary guidance, treatment knowledge, etc.). |
| 1-2 Paper materials | The nurses provided information support to the patients using paper materials (such as ostomy care instructions, dietary guidance, treatment knowledge, etc.). |
| 1-3 Video | The nurse provides information support to the patients through videos (such as ostomy care, dietary guidance, treatment knowledge, etc.). |
| 1-4 Multimedia platform | The nurse uses a multimedia platform to provide information support to patients (including ostomy care, dietary guidance, treatment knowledge, etc.). |
| 1. Providers of basic nursing   services | 2-1 Nurse | During the patient's hospital stay, the basic care (including mobility care, cleaning care, excretion care, meal service, and infusion care) was handled by the nurse. |
| 2-2 Nursing assistant | During the patient's hospital stay, the basic care (including mobility care, cleaning care, excretion care, meal service, and infusion care) was handled by the nursing assistant. |
| 2-3 Nurse and nursing assistant | During the patient's hospital stay, the basic care (including mobility care, cleaning care, excretion care, meal service, and infusion care) was jointly handled by the Nurse and the nursing assistant. |
| 3.Frequency of family visits | 3-1 Once a day | The family members visit the patient once a day. |
| 3-2 Twice a day | The family members visit the patient twice a day. |
| 3-3 More than twice a day | The family members visit the patient more than twice a day |
| 4.Duration of family visitation | 4-1 Less than1 hour per time | The duration of each family visit is within one hour. |
| 4-2 1 to 2 hours per time | The duration of each family visit is more than one hour but less than two hours. |
| 4-3 More than 2 hours per time | The duration of each family visit is two hours or more. |
| 5.Cost of self-paid nursing  assistants(yuan/day) | 5-1 50~80 | The patient is responsible for paying 50 to 80 yuan per day for the nursing assistant. |
| 5-2 80~100 | The patient is responsible for paying 80 to 100 yuan per day for the nursing assistant. |
| 5-3 130~150 | The patient is responsible for paying 130 to 150 yuan per day for the nursing assistant. |
| 6.Caregiver-to-patient ratio | 6-1 One-to-one | A Nursing assistant takes care of 1 patient. |
| 6-2 One-to-two | A Nursing assistant takes care of 2 patients. |
| 6-3 One-to-three | A Nursing assistant takes care of 3 patients. |
| 6-4 More than one-to-three | A Nursing assistant takes care of more than 3 patients. |
| 1. Caregiver service quality   assurance | 7-1 Hospital | The nursing assistant is trained by the hospital. |
| 7-2 Labor service company | The nursing assistant is trained by the labor service company |
| 7-3 Either hospital or Labor service company | The nursing assistant can be trained by either the hospital or the labor service company. |
|  | 7-4 Hospital and Labor service  company | The nursing assistant can be trained jointly by the hospital and the labor service company. |

**Supplementary Material 6.**

Attribute importance sorting results (N=20)

| **Attribute** | **Importance（N%）** | | |
| --- | --- | --- | --- |
|  | **Very important** | **Important** | **General important** |
| Providers of basic nursing services | 18（90%） | 2（10%） | 0（0%） |
| Duration of family visitation | 17（85%） | 3（15%） | 0（0%） |
| Frequency of family visits | 16（80%） | 4（20%） | 0（0%） |
| Cost of self-paid nursing assistants(yuan/day) | 15（75%） | 5（25%） | 0（0%） |
| Caregiver-to-patient ratio | 13（65%） | 6（30%） | 1（5%） |
| Caregiver service quality assurance | 12（60%） | 5（25%） | 3（15%） |
| Form of information support | 10（50%） | 9（45%） | 1（5%） |

**Supplementary Material 7.**

Self-care ability, anxiety and depression, and social support score situation

1）Self-care ability scores of patients after radical resection of colorectal cancer

| **Variable** | **Variable classification** | **Number of people** | **Percentage（%）** | **Score**  **（±S）** |
| --- | --- | --- | --- | --- |
| Self-care ability | Mild dependence | 126 | 39.38 | （74.17±9.96） |
|  | Moderate dependence | 154 | 48.13 | （55.10±5.00） |
|  | Severe dependence | 40 | 12.49 | （30.75±8.88） |

2）Scores of anxiety and depression in patients after radical resection of colorectal cancer

| **Variable** | **Variable classification** | **Number of people** | **Percentage（%）** | **Score**  **（±S）** |
| --- | --- | --- | --- | --- |
| Anxiety | No anxiety (0 - 7 points) | 192 | 60.00 | （4.67±2.26） |
|  | Borderline anxiety (8 - 10 points) | 88 | 27.50 | （8.26±0.54） |
|  | Anxiety (11 - 21 points) | 40 | 12.5 | （14.55±2.48） |
| Depression | No depression (0 - 7 points) | 221 | 69.06 | （4.04±1.80） |
|  | Borderline depression (8 - 10 points) | 70 | 21.88 | （8.73±0.68） |
|  | Depression (11 - 21 points) | 29 | 9.06 | （13.79±3.37） |

3）Social support scores of patients after radical resection of colorectal cancer

| **Variable** | **Variable classification** | **Number of people** | **Percentage（%）** | **Score**  **（±S）** |
| --- | --- | --- | --- | --- |
| Social support | Medium level social support | 249 | 77.81 | （38.66±4.03） |
|  | High level social support | 71 | 22.19 | （48.13±2.42） |

**Supplementary Material 8.**

**Subgroup analysis**

1）Effects of gender on supportive service preferences of patients undergoing radical surgery for colorectal cancer（N=320）

| **Attribute and level**  **（Reference level）** | **Male（n=195）** | | | **Female（n=125）** | | |
| --- | --- | --- | --- | --- | --- | --- |
| **β** | **SE** | **WTP** | **β** | **SE** | **WTP** |
| Providers of basic nursing services（Nurse） | | | | | | |
| Nursing assistant | -0.019 | 0.001 | -0.381 | 0.104 | 0.106 | 5.699 |
| Nurse and nursing assistant | -0.072* | 0.085 | -15.765 | -0.159 | 0.111 | -8.765 |
| Frequency of family visits（Once a day） | | | | | | |
| Twice a day | 0.363* | 0.083 | 19.242 | 0.669* | 0.137 | 36.814 |
| More than twice a day | 0.702* | 0.092 | 37.160 | 1.022* | 0.250 | 56.260 |
| Duration of family visitation（Less than1 hour per time） | | | | | | |
| 1 to 2 hours per time | 0.310* | 0.095 | 16.421 | 0.164** | 0.145 | 9.030 |
| More than 2 hours per time | 0.762* | 0.081 | 40.358 | 0.611* | 0.104 | 33.626 |
| Caregiver-to-patient ratio（One-to-one） | |  |  |  |  |  |
| One-to-two | -0.423* | 0.111 | -22.411 | -0.325** | 0.157 | -17.878 |
| One-to-three | -0.487* | 0.104 | -25.796 | -0.207 | 0.137 | -11.409 |
| More than one-to-three | -1.062* | 0.139 | -56.246 | -1.150* | 0.244 | -63.128 |
| Caregiver service quality assurance（Hospital） | | | | | | |
| Labor service company | -0.493* | 0.095 | -26.092 | -0.352* | 0.114 | -19.393 |
| Either hospital or labor service | -0.223* | 0.102 | -11.795 | -0.065 | 0.138 | -3.599 |
| Hospital and labor service company | -0.362* | 0.131 | -19.151 | -0.353 | 0.194 | -19.451 |
| Form of information support（Face-to-face communication between nurses and patients） | | | | | | |
| Paper materials | 0.085 | 0.101 | 4.518 | 0.077 | 0.122 | 4.232 |
| Video | 0.094 | 0.122 | 4.992 | -0.094 | 0.172 | -5.172 |
| Multimedia platform | 0.383* | 0.006 | 20.280 | 0.543* | 0.196 | 29.873 |
| Cost of self-paid nursing assistants(yuan/day) | -0.019* | 0.001 |  | -0.002** | 0.001 |  |
| Likelihood ratio test（LR chi2） | 283.600 |  |  | 488.600 |  |  |
| Log likelihood ratio（Log likelihood） | -968.381 |  |  | -642.426 |  |  |
| Akaike Information Criterion (AIC) | 1968.762 |  |  | 1316.852 |  |  |
| Bayesian Information Criterion (BIC) | 2067.376 |  |  | 1408.351 |  |  |

Note:**p*<0.01，***p*<0.05

2）Effect of different ages on supportive service preferences of patients undergoing radical surgery for colorectal cancer（N=320）

| **Attribute and level**  **（Reference level）** | | **18 to 59 years old（n=129）** | | | **≥60 years old（n=191）** | | | |
| --- | --- | --- | --- | --- | --- | --- | --- | --- |
| **β** | **SE** | **WTP** | **β** | **SE** | | **WTP** |
| Providers of basic nursing services（Nurse） | | | | | | | | |
| Nursing assistant | | -0.054 | 0.101 | -3.084 | 0.031 | 0.086 | | 3.902 |
| Nurse and nursing assistant | -0.147 | | 0.101 | -8.317 | -0.295* | | 0.086 | -15.568 |
| Frequency of family visits（Once a day） | | | | | | | | |
| Twice a day | 0.419* | | 0.113 | 23.762 | 0.510* | | 0.098 | 26.916 |
| More than twice a day | 0.679* | | 0.149 | 38.542 | 0.898* | | 0.131 | 47.424 |
| Duration of family visitation（Less than1 hour per time） | | | | | | | | |
| 1 to 2 hours per time | 0.217 | | 0.119 | 12.337 | 0.303** | | 0.102 | 16.011 |
| More than 2 hours per time | 0.605* | | 0.097 | 34.353 | 0.773* | | 0.084 | 40.784 |
| Caregiver-to-patient ratio（One-to-one） | | | | | | | | |
| One-to-two | -0.415** | | 0.136 | -23.532 | -0.343** | | 0.116 | -18.131 |
| One-to-three | -0.317** | | 0.125 | -18.000 | -0.408* | | 0.107 | -21.555 |
| More than one-to-three | -1.096* | | 0.182 | -62.185 | -1.048* | | 0.153 | -55.329 |
| Caregiver service quality assurance（Hospital） | | | | | | | | |
| Labor service company | -0.507* | | 0.114 | -28.794 | -0.382** | | 0.095 | -20.156 |
| Either hospital or labor service company | -0.219 | | 0.124 | -12.467 | -0.125 | | 0.106 | -6.600 |
| Hospital and labor service company | -0.441* | | 0.161 | -25.017 | -0.268 | | 0.139 | -14.174 |
| Form of information support（Face-to-face communication between nurses and patients） | | | | | | | | |
| Paper materials | 0.054 | | 0.119 | 3.082 | 0.112 | | 0.102 | 5.927 |
| Video | 0.013 | | 0.139 | 0.491 | 0.123* | | 0.159 | 2.591 |
| Multimedia platform | 0.535* | | 0.154 | 30.391 | 0.356 | | 0.132 | 18.808 |
| Cost of self-paid nursing assistants(yuan/day) | -0.017* | | 0.001 |  | -0.019* | | 0.001 |  |
| Likelihood ratio test（LR chi2） | 283.600 | |  |  | 488.600 | |  |  |
| Log likelihood ratio（Log likelihood） | -656.704 | |  |  | -953.457 | |  |  |
| Akaike Information Criterion (AIC) | 961.270 | |  |  | 1082.352 | |  |  |
| Bayesian Information Criterion (BIC) | 1390.617 | |  |  | 1476.612 | |  |  |

Note:**p*<0.01，***p*<0.05

3）Effects of different education levels on supportive service preferences of patients undergoing radical surgery for colorectal cancer（N=320）

| **Attribute and level**  **（Reference level）** | **Junior education（n=210）** | | | **High education（n=67）** | | | **College degree（n=43）** | | |
| --- | --- | --- | --- | --- | --- | --- | --- | --- | --- |
| **β** | **SE** | **WTP** | **β** | **SE** | **WTP** | **β** | **SE** | **WTP** |
| Providers of basic nursing services（Nurse） | | | | | | | | | |
| Nursing assistant | 0.079 | 0.084 | 3.901 | -0.224* | 0.156 | -10.835 | -0.177 | 0.002 | -15.517 |
| Nurse and nursing assistant | -0.028* | 0.086 | -13.809 | -0.167 | 0.156 | -8.088 | -0.231* | 0.170 | -20.166 |
| Frequency of family visits（Once a day） | | | | | | | | | |
| Twice a day | 0.534* | 0.098 | 26.316 | 0.456** | 0.185 | 22.047 | 0.218 | 0.163 | 19.047 |
| More than twice a day | 0.883* | 0.136 | 43.487 | 0.773** | 0.263 | 37.401 | 0.608** | 0.175 | 53.181 |
| Duration of family visitation（Less than1 hour per time） | | | | | | | | | |
| 1 to 2 hours per time | 0.317** | 0.104 | 15.605 | 0.188* | 0.200 | 9.091 | 0.317* | 0.197 | 27.720 |
| More than 2 hours per time | 0.958* | 0.086 | 47.206 | 0.578 | 0.141 | 27.940 | -0.048 | 0.174 | -4.229 |
| Caregiver-to-patient ratio（One-to-one） | | | | | | | | | |
| One-to-two | -0.404* | 0.118 | -19.922 | -0.515* | 0.226 | -24.895 | 0.020 | 0.156 | 1.716 |
| One-to-three | -0.337** | 0.106 | -16.576 | -0.828* | 0.201 | -40.044 | 0.092 | 0.202 | 8.077 |
| More than one-to-three | -1.040* | 0.156 | -51.225 | -1.553* | 0.336 | -75.131 | -0.918* | 0.248 | -80.290 |
| Caregiver service quality assurance（Hospital） | | | | | | | | | |
| Labor service company | -0.447* | 0.094 | -22.028 | -0.599* | 0.164 | -28.983 | -0.053 | 0.195 | -4.672 |
| Either hospital or labor service company | -0.169 | 0.105 | -8.311 | -0.206 | 0.193 | -9.945 | 0.023 | 0.206 | 1.991 |
| Hospital and labor service company | -0.241 | 0.144 | -11.872 | -0.615 | 0.262 | -29.759 | -0.236* | 0.246 | -20.670 |
| Form of information support（Face-to-face communication between nurses and patients） | | | | | | | | | |
| Paper materials | 0.165 | 0.104 | 8.132 | -0.110 | 0.172 | -5.306 | 0.087 | 0.195 | 7.567 |
| Video | 0.028 | 0.125 | 1.362 | 0.050 | 0.239 | 2.409 | -0.035 | 0.204 | -3.046 |
| Multimedia platform | 0.413** | 0.135 | 20.339 | 0.655 | 0.260 | 31.697 | 0.428 | 0.222 | 37.405 |
| Cost of self-paid nursing assistants(yuan/day) | -0.020* | 0.001 |  | -0.021* | 0.001 |  | -0.011* | 0.002 |  |
| Likelihood ratio test  (LR chi2） | 605.010 |  |  | 182.930 |  |  | 73.790 |  |  |
| Log likelihood ratio（Loglikelihood） | -1007.544 |  |  | -326.500 |  |  | -231.345 |  |  |
| Akaike Information Criterion (AIC) | 2047.088 |  |  | 685.000 |  |  | 259.958 |  |  |
| Bayesian Information  Criterion (BIC) | 2146.887 |  |  | 766.521 |  |  | 323.661 |  |  |

Note:**p*<0.01，***p*<0.05

4）Effects of employment on supportive service preference of patients undergoing radical surgery for colorectal cancer（N=320）

| **Attribute and level**  **（Reference level）** | **Unemployed（n=205）** | | | **Employed（n=56）** | | | **Retired（n=59）** | | | | | |
| --- | --- | --- | --- | --- | --- | --- | --- | --- | --- | --- | --- | --- |
| **β** | **SE** | **WTP** | **β** | **SE** | **WTP** | **β** | | **SE** | | **WTP** | |
| Providers of basic nursing services（Nurse） | | | | | | | | | | | | |
| Nursing assistant | 0.091 | 0.086 | 4.348 | -0.661* | 0.207 | -50.645 | -0.040 | | 0.159 | | -12.695 | |
| Nurse and nursing  assistant | -0.300* | 0.090 | -14.293 | -0.161 | 0.185 | -12.313 | -0.230 | | 0.152 | | 22.208 | |
| Frequency of family visits（Once a day） | | | | | | | | | | | | |
| Twice a day | 0.532* | 0.102 | 25.332 | 0.164 | 0.199 | 12.572 | 0.403** | | 0.183 | | 42.951 | |
| More than twice a day | 0.883* | 0.143 | 42.087 | 0.631** | 0.209 | 48.346 | 0.779** | | 0.252 | | 15.216 | |
| Duration of family visitation（Less than1 hour per time） | | | | | | | | | | | | |
| 1 to 2 hours per time | 0.316* | 0.107 | 15.071 | 0.443** | 0.191 | 33.972 | 0.276 | | 0.193 | | 14.198 | |
| More than 2 hours per time | 1.023* | 0.089 | 48.735 | 0.127 | 0.176 | 9.732 | 0.257 | | 0.142 | | -16.112 | |
| Caregiver-to-patient ratio（One-to-one） | | | | | | | | | | | | |
| One-to-two | -0.442* | 0.123 | -21.085 | -0.015 | 0.237 | -1.138 | -0.292 | | 0.210 | | -37.404 | |
| One-to-three | -0.350* | 0.110 | -16.668 | -0.235 | 0.235 | -18.001 | -0.678* | | 0.199 | | -70.683 | |
| More than one-to-three | -1.058* | 0.163 | -50.406 | -1.394* | 0.276 | -106.795 | | -1.282* | | 0.311 | | -15.212 | |
| Caregiver service quality assurance（Hospital） | | | | | | | | | | | | |
| Labor service company | -0.458* | 0.097 | -21.826 | -0.228 | 0.215 | -17.445 | -0.276 | | 0.165 | | 2.490 | |
| Either hospital or labor service company | -0.232* | 0.108 | -11.077 | 0.162 | 0.223 | 12.447 | 0.045 | | 0.197 | | -20.645 | |
| Hospital and labor  service | -0.232 | 0.151 | -11.074 | -0.192 | 0.272 | -14.732 | -0.374 | | 0.257 | | 11.893 | |
| Form of information support（Face-to-face communication between nurses and patients） | | | | | | | | | | | | |
| Paper materials | 0.139 | 0.109 | 6.601 | -0.069 | 0.218 | -5.324 | 0.216 | | 0.172 | | 9.318 | |
| Video | 0.039 | 0.131 | 1.866 | -0.243 | 0.223 | -18.618 | 0.169 | | 0.235 | | 9.318 | |
| Multimedia platform | 0.450* | 0.139 | 21.454 | 0.518* | 0.240 | 39.688 | 0.626* | | 0.249 | | 34.524 | |
| Cost of self-paid nursing assistants(yuan/day) | -0.020* | 0.001 |  | -0.130* | 0.002 |  | -0.018* | | 0.002 | |  | |
| Likelihood ratio test（LR chi2） | 626.600 |  |  | 113.13 |  |  | 130.440 | |  | |  | |
| Log likelihood ratio  （Loglikelihood） | -965.556 |  |  | -217.922 |  |  | -302.842 | |  | |  | |
| Akaike Information  Criterion (AIC) | 1963.111 |  |  | 467.845 |  |  | 777.236 | |  | |  | |
| Bayesian Information  Criterion (BIC) | 2062.525 |  |  | 542.638 |  |  | 859.685 | |  | |  | |

Note:**p*<0.01，***p*<0.05

5）Effects of per capita monthly income of different families on supportive service preferences of patients undergoing radical surgery for colorectal cancer（N=320）

| **Attribute and level**  **（Reference level）** | | **<3600（n=161）** | | | **3600~5099（n=122）** | | | **>=5100（n=37）** | | |
| --- | --- | --- | --- | --- | --- | --- | --- | --- | --- | --- |
| **β** | **SE** | **WTP** | **β** | **SE** | **WTP** | **β** | **SE** | **WTP** |
| Providers of basic nursing services（Nurse） | | | | | | | | | | |
| Nursing assistant | | 0.087 | 0.097 | 3.860 | 0.021 | 0.112 | 1.134 | -0.401** | 0.186 | -36.246 |
| Nurse and nursing  assistant | | -0.171* | 0.106 | -7.558 | -0.254** | 0.111 | -13.834 | -0.327 | 0.176 | -29.593 |
| Frequency of family visits（Once a day） | | | | | | | | | | |
| Twice a day | | 0.572* | 0.117 | 25.340 | 0.475** | 0.134 | 25.918 | 0.291 | 0.185 | 26.287 |
| More than twice a day | | 0.887* | 0.167 | 39.304 | 0.910** | 0.191 | 49.625 | 0.692* | 0.205 | 62.556 |
| Duration of family visitation（Less than1 hour per time） | | | | | | | | | | |
| 1 to 2 hours per time | 0.287** | 0.121 | 12.722 | 0.257* | 0.144 | 14.020 | 0.410** | 0.189 | 37.026 |
| More than 2 hours per time | 1.076* | 0.110 | 47.659 | 0.552 | 0.099 | 30.091 | 0.087 | 0.169 | 7.828 |
| Caregiver-to-patient ratio（One-to-one） | | | | | | | | | |
| One-to-two | -0.239 | 0.145 | -10.586 | -0.593* | 0.160 | -32.345 | 0.008 | 0.220 | 0.767 |
| One-to-three | -0.293** | 0.124 | -12.999 | -0.593* | 0.145 | -32.361 | 0.044 | 0.219 | 3.979 |
| More than one-to-three | -1.024** | 0.180 | -45.356 | -1.353* | 0.240 | -73.768 | -0.840* | 0.261 | -75.979 |
| Caregiver service quality assurance（Hospital） | | | | | | | | | |
| Labor service company | -0.346* | 0.108 | -15.346 | -0.605* | 0.122 | -32.994 | -0.007* | 0.214 | -0.618 |
| Either hospitals or  labor service | -0.157* | 0.125 | -6.954 | -0.199 | 0.139 | -10.840 | 0.068 | 0.216 | 6.189 |
| Hospital and labor service company | -0.061 | 0.172 | -2.722 | -0.575** | 0.189 | -31.363 | -0.252 | 0.258 | -22.737 |
| Form of information support（Face-to-face communication between nurses and patients） | | | | | | | | | |
| Paper materials | 0.050 | 0.126 | 2.196 | 0.173 | 0.127 | 9.433 | -0.007 | 0.211 | -0.606 |
| Video | -0.073 | 0.155 | -3.252 | 0.105 | 0.170 | 5.708 | -0.145 | 0.214 | -13.149 |
| Multimedia platform | 0.348** | 0.155 | 15.395 | 0.643 | 0.191 | 35.069 | 0.335 | 0.335 | 30.326 |
| Cost of self-paid  nursing assistants  (yuan/day) | -0.022* | 0.002 |  | -0.018* | 0.002 |  | -0110* | 0.023 |  |
| Likelihood ratio test  （LR chi2） | 495.610 |  |  | 292.320 |  |  | 62.600 |  |  |
| Log likelihood ratio  （Loglikelihood） | -756.566 |  |  | -614.916 |  |  | -199.516 |  |  |
| Akaike Information  Criterion (AIC) | 1545.131 |  |  | 1261.831 |  |  | 431.031 |  |  |
| Bayesian Information  Criterion (BIC) | 1640.680 |  |  | 1352.941 |  |  | 503.052 |  |  |

Note:**p*<0.01，***p*<0.05

6）Effect of religious belief on supportive service preferences of patients undergoing radical surgery for colorectal cancer（N=320）

| **Attribute and level**  **（Reference level）** | **No religious belief（n=212）** | | | **Have religious beliefs（n=108）** | | |
| --- | --- | --- | --- | --- | --- | --- |
| **β** | **SE** | **WTP** | **β** | **SE** | **WTP** |
| Providers of basic nursing services（Nurse） | | | | | | |
| Nursing assistant | -0.021 | 0.077 | -1.243 | 0.023 | 0.139 | 0.962 |
| Nurse and nursing  assistant | -0.166** | 0.076 | -9.925 | -0.421** | 0.147 | -17.487 |
| Frequency of family visits（Once a day） | | | | | | |
| Twice a day | 0.402* | 0.084 | 24.117 | 0.716* | 0.189 | 29.768 |
| More than twice a day | 0.666* | 0.108 | 39.915 | 1.278* | 0.295 | 53.048 |
| Duration of family visitation（Less than1 hour per time） | | | | | | |
| 1 to 2 hours per time | 0.202** | 0.087 | 12.089 | 0.317 | 0.207 | 13.152 |
| More than 2 hours per time | 0.399* | 0.746 | 23.978 | 1.451* | 0.137 | 60.276 |
| Caregiver-to-patient ratio（One-to-one） | | | | | | |
| One-to-two | -0.278** | 0.099 | -16.696 | -0.655** | 0.236 | -27.206 |
| One-to-three | -0.286** | 0.094 | -17.146 | -1.246* | 0.188 | -27.461 |
| More than one-to-three | -1.07* | 0.129 | -64.332 | -0.853* | 0.363 | -51.763 |
| Caregiver service quality assurance（Hospital） | | | | | | |
| Labor service company | -0.305* | 0.086 | -18.272 | -0.461* | 0.161 | -35.450 |
| Either hospital or labor service company | -0.056 | 0.095 | -3.349 | -0.808** | 0.178 | -19.169 |
| Hospital and labor service company | -0.197 | 0.121 | -11.794 | 0.125* | 0.263 | -33.552 |
| Form of information support（Face-to-face communication between nurses and patients） | | | | | | |
| Paper materials | 0.658 | 0.090 | 3.949 | -0.093 | 0.001 | 5.186 |
| Video | 0.442 | 0.105 | 2.515 | 0.463 | 0.242 | -3.843 |
| Multimedia platform | 0.409* | 0.113 | 24.538 | 0.480 | 0.287 | 19.225 |
| Cost of self-paid nursing  assistants(yuan/day) | -0.017* | 0.001 |  | -0.024* | 0.003 |  |
| Likelihood ratio test（LR chi2） | 415.090 |  |  | 440.760 |  |  |
| Log likelihood ratio（Loglikelihood） | -111.981 |  |  | -453.358 |  |  |
| Akaike Information Criterion (AIC) | 2261.962 |  |  | 938.7156 |  |  |
| Bayesian Information Criterion (BIC) | 2361.913 |  |  | 1027.875 |  |  |

Note:**p*<0.01，***p*<0.05

7）Effect of tumor locationon supportive service preferences of patients undergoing radical surgeryfor colorectal cancer（N=320）

| **Attribute and level**  **（Reference level）** | **Rectum（n=166）** | | | **Colon（n=154）** | | |
| --- | --- | --- | --- | --- | --- | --- |
| **β** | **SE** | **WTP** | **β** | **SE** | **WTP** |
| Providers of basic nursing services(Nurse） | | | | | | |
| Nursing assistant | -0.012 | 0.093 | -0.688 | 0.032 | 0.107 | 1.564 |
| Nurse and nursing assistant | -0.292* | 0.092 | -16.778 | -0.064 | 0.115 | -3.081 |
| Frequency of family visits（Once a day） | | | | | | |
| Twice a day | 0.413* | 0.103 | 23.738 | 0.518* | 0.124 | 25.043 |
| More than twice a day | 0.710* | 0.134 | 40.817 | 0.922* | 0.173 | 44.575 |
| Duration of family visitation（Less than1 hour per time） | | | | | | |
| 1 to 2 hours per time | 0.209 | 0.108 | 12.056 | 0.365** | 0.129 | 17.663 |
| More than 2 hours per time | 0.503* | 0.087 | 28.920 | 0.945* | 0.122 | 45.687 |
| Caregiver-to-patient ratio（One-to-one） | | | | | | |
| One-to-two | -0.466* | 0.122 | -26.811 | -0.052 | 0.159 | -2.497 |
| One-to-three | -0.424* | 0.116 | -24.389 | -0.159 | 0.135 | -7.694 |
| More than one-to-three | -1.113* | 0.163 | -63.989 | -0.969* | 0.190 | -46.831 |
| Caregiver service quality assurance（Hospital） | | | | | | |
| Labor service company | -0.368* | 0.103 | -21.200 | -0.410* | 0.120 | -19.845 |
| Either hospital or labor service company | -0.085 | 0.115 | -4.887 | -0.204 | 0.134 | -9.857 |
| Hospital and labor service company | -0.206 | 0.149 | -11.817 | -0.280 | 0.176 | -13.541 |
| Form of information support（Face-to-face communication between nurses and patients） | | | | | | |
| Paper materials | 0.071 | 0.109 | 4.064 | 0.099 | 0.132 | 4.774 |
| Video | 0.084 | 0.129 | 4.799 | -0.169 | 0.165 | -8.169 |
| Multimedia platform | 0.456* | 0.139 | 26.218 | 0.359 | 0.166 | 17.383 |
| Cost of self-paid nursing assistants(yuan/day) | -0.017* | 0.002 |  | -0.021* | 0.001 |  |
| Likelihood ratio test  （LR chi2） | 334.420 |  |  | 326.070 |  |  |
| Log likelihood ratio  （Loglikelihood） | -794.989 |  |  | -598.039 |  |  |
| Akaike Information  Criterion (AIC) | 1621.980 |  |  | 663.204 |  |  |
| Bayesian Information  Criterion (BIC) | 1716.817 |  |  | 743.740 |  |  |

Note:**p*<0.01，***p*<0.05

8）Effects of tumor stage on supportive service preference of patients undergoing radical surgery for colorectal cancer（N=320）

| **Attribute and level**  **（Reference level）** | **I（n=26）** | | | **II（n=81）** | | | | | | **III（n=170）** | | | | **IV（n=43）** | | | | | |
| --- | --- | --- | --- | --- | --- | --- | --- | --- | --- | --- | --- | --- | --- | --- | --- | --- | --- | --- | --- |
| **β** | **SE** | **WTP** | **β** | **SE** | | | **WTP** | | **β** | **SE** | **WTP** | | **β** | | **SE** | | **WTP** | |
| Providers of basic nursing services（Nurse） | | | | | | | | | | | | | | | | | | | |
| Nursing assistant | -0.085 | 0.254 | -4.196 | 0.165 | 0.127 | | | 10.486 | | -1.06 | 0.001 | -5.534 | | 0.084 | | 0.192 | | 3.837 | |
| Nurse and nursing assistant | -0.407* | 0.261 | -19.976 | -0.045 | 0.126 | | | -2.866 | | -0.393 | 0.090 | -20.482 | | 0.426 | | 0.200 | | 1.947 | |
| Frequency of family visits（Once a day） | | |  |  |  | | |  | |  |  |  | |  | |  | |  | |
| Twice a day | 0.475** | 0.344 | 23.287 | 0.454* | 0.136 | | | 28.848 | | 0.458* | 0.091 | 23.847 | | 0.579** | | 0.235 | | 26.500 | |
| More than twice a day | 1.099** | 0.524 | 53.824 | 0.746* | 0.173 | | | 47.344 | | 0.816* | 0.103 | 42.501 | | 0.774** | | 0.342 | | 35.408 | |
| Duration of family visitation（Less than1 hour per time） | | | | | | | | | | | | | | | | | | | |
| 1 to 2 hours per time | -0.212 | 0.377 | -10.420 | 0.290** | 0.140 | | | 18.427 | | 0.253** | 0.109 | 13.183 | | 0.529* | | 0.252 | | 24.220 | |
| More than 2 hours per time | 0.248 | 0.220 | 12.148 | 0.499* | 0.126 | | | 31.713 | | 0.749* | 0.087 | 38.996 | | 1.286** | | 0.208 | | 58.833 | |
| Caregiver-to-patient ratio（One-to-one） | | | | | | | | | | | | | | | | | | | |
| One-to-two | -0.254 | 0.386 | -12.473 | -0.109 | 0.164 | | | -6.962 | | -0.447* | 0.124 | -23.271 | | -0.681** | | 0.293 | | -31.168 | |
| One-to-three | -0.407 | 0.326 | -19.917 | -0.043 | 0.154 | | | -2.768 | | -0.444* | 0.113 | -23.151 | | -0.719* | | 0.251 | | -32.911 | |
| More than one-to-  three | -1.010 | 0.663 | -49.464 | -1.082* | 0.199 | | | -68.672 | | -1.030* | 0.168 | -53.650 | | -1.467 | | 0.400 | | -67.124 | |
| Caregiver service quality assurance（Hospital） | | | | | | | | | | | | | | | | | | | |
| Labor service company | -0.720** | 0.269 | -35.286 | -0.308** | | 0.141 | -19.597 | | -0.465* | | 0.101 | | -24.242 | | -0.315 | | 0.215 | | -14.404 | |
| Either hospital or labor service  company | 0.019 | 0.346 | 0.940 | 0.017 | 0.155 | | | 1.104 | | -0.309** | 0.112 | -16.099 | | -0.009 | | 0.239 | | 0.438 | |
| Hospital and  labor service  company | -0.570 | 0.471 | -27.929 | -0.039 | 0.199 | | | -2.525 | | -0.477* | 0.147 | -24.875 | | -0.306 | | 0.351 | | -13.981 | |
| Form of information support（Face-to-face communication between nurses and patients） | | | | | | | | | | | | | | | | | | | |
| Paper materials | -0.022 | 0.269 | -1.094 | 0.017 | 0.150 | | | 1.097 | | 0.131 | 0.107 | 6.820 | | 0.148 | | 0.244 | | 6.812 | |
| Video | 0.136 | 0.420 | 6.669 | -0.049 | 0.171 | | | -3.121 | | 0.064 | 0.129 | 3.374 | | -0.026 | | 0.303 | | -1，195 | |
| Multimedia platform | 0.552 | 0.517 | 27.054 | 0.259 | 0.179 | | | 16.467 | | 0.491* | 0.142 | 25.588 | | 0.567 | | 0.326 | | 25.963 | |
| Cost of self-paid nursing assistants  (yuan/day) | -0.020* | 0.005 |  | -0.015 | 0.002 | | |  | | -0.192* | 0.001 |  | | -0.021* | | 0.004 | |  | |
| Likelihood ratio  test（LR chi2） | 66.030 |  |  | 436.660 |  | | |  | | 176.540 |  |  | | 146.670 | |  | |  | |
| Log likelihood  Ratio  （Loglikelihood） | -129.183 |  |  | -842.185 |  | | |  | | -417.020 |  |  | | -194.911 | |  | |  | |
| Akaike  Information  Criterion (AIC) | 290.366 |  |  | 1716.370 |  | | |  | | 866.042 |  |  | | 421.822 | |  | |  | |
| Bayesian  Information  Criterion (BIC) | 356.742 |  |  | 1812.780 |  | | |  | | 950.599 |  |  | | 496.247 | |  | |  | |

Note:**p*<0.01，***p*<0.05

9）Influence of presence or absence of stoma on supportive service preferences of patients undergoing radical surgery for colorectal cancer（N=320）

| **Attribute and level**  **（Reference level）** | **None stoma（n=279）** | | | **Have an ostomy（n=41）** | | |
| --- | --- | --- | --- | --- | --- | --- |
| **β** | **SE** | **WTP** | **β** | **SE** | **WTP** |
| Providers of basic nursing services（Nurse） | | | | | | |
| Nursing assistant | -0.029 | 0.071 | -1.520 | 0.158 | 0.189 | 10.599 |
| Nurse and nursing assistant | -0.220* | 0.071 | -11.510 | -0.304* | 0.183 | -20.375 |
| Frequency of family visits（Once a day） | | | | | | |
| Twice a day | 0.467* | 0.079 | 24.405 | 0.545** | 0.228 | 36.556 |
| More than twice a day | 0.808* | 0.105 | 42.215 | 0.890 | 0.329 | 59.712 |
| Duration of family visitation（Less than1 hour per time） | | | | | | |
| 1 to 2 hours per time | 0.305* | 0.083 | 15.916 | 0.033 | 0.242 | 2.184 |
| More than 2 hours per time | 0.801* | 0.070 | 41.864 | 0.137 | 0.269 | 9.163 |
| Caregiver-to-patient ratio（One-to-one） | | | | | | |
| One-to-two | -0.353* | 0.096 | -18.447 | -0.469* | 0.256 | -31.474 |
| One-to-three | -0.351* | 0.087 | -18.314 | -0.490** | 0.244 | -32.882 |
| More than one-to-three | -1.040* | 0.125 | -54.296 | -1.333* | 0.400 | -89.388 |
| Caregiver service quality assurance（Hospital） | | | | | | |
| Labor service company | -0.499* | 0.079 | -26.063 | 0.021 | 0.198 | 1.387 |
| Either hospitals or labor service | -0.259* | 0.086 | -13.530 | -0.491** | 0.243 | -32.906 |
| Hospital and labor service company | -0.438* | 0.112 | -22.865 | 0.308 | 0.337 | 20.674 |
| Form of information support（Face-to-face communication between nurses and patients） | | | | | | |
| Paper materials | 0.052* | 0.084 | 2.706 | 0.300 | 0.216 | 20.119 |
| Video | 0.008 | 0.100 | 0.392 | 0.150 | 0.290 | 10.090 |
| Multimedia platform | 0.406* | 0.108 | 21.202 | 0.573 | 0.315 | 38.418 |
| Cost of self-paid nursing assistants (yuan/day) | -0.019* | 0.001 |  | -0.149* | 0.003 |  |
| Likelihood ratio test（LR chi2） | 705.410 |  |  | 83.800 |  |  |
| Log likelihood ratio（Loglikelihood） | -1387.789 |  |  | -213.869 |  |  |
| Akaike Information Criterion (AIC) | 2807.579 |  |  | 459.7386 |  |  |
| Bayesian Information Criterion (BIC) | 2911.925 |  |  | 533.4017 |  |  |

Note:**p*<0.01，***p*<0.05

10)The effect of self care ability on supportive service preferences of patients undergoing radical surgery for colorectal cancer（N=320）

| **Attribute and level**  **（Reference level）** | **Mild dependence（n=126）** | | | **Moderate dependence（n=154）** | | | **Severe dependence（n=40）** | | |
| --- | --- | --- | --- | --- | --- | --- | --- | --- | --- |
| **β** | **SE** | **WTP** | **β** | **SE** | **WTP** | **β** | **SE** | **WTP** |
| Providers of basic nursing services（Nurse） | | | | | | | | | |
| Nursing assistant | 0.098 | 0.103 | 5.487 | -0.149 | 0.002 | -7.234 | 0.068 | 0.217 | 3.789 |
| Nurse and nursing assistant | -0.060 | 0.099 | -3.353 | -0.429* | 0.101 | -20.867 | -0.230 | 0.241 | -12.747 |
| Frequency of family visits（Once a day） | | | | | | | | | |
| Twice a day | 0.384* | 0.111 | 21.477 | 0.481* | 0.105 | 23.350 | 0.861** | 0.337 | 45.186 |
| More than twice a day | 0.556* | 0.139 | 31.034 | 1.010* | 0.116 | 49.289 | 1.414** | 0.560 | 78.346 |
| Duration of family visitation（Less than1 hour per time） | | | | | | | | | |
| 1 to 2 hours per time | 0.066 | 0.114 | 3.702 | 0.547* | 0.162 | 26.546 | 0.077 | 0.370 | 4.309 |
| More than 2 hours per time | 0.289** | 0.096 | 16.124 | 1.253* | 0.125 | 60.825 | 0.312 | 0.184 | 17.304 |
| Caregiver-to-patient ratio（One-to-one） | | | | | | | | | |
| One-to-two | -0.430* | 0.133 | -24.051 | -0.301** | 0.109 | -14.613 | -0.423 | 0.388 | -23.411 |
| One-to-three | -0.320** | 0.127 | -17.916 | -0.375** | 0.140 | -18.237 | -0.491 | 0.310 | -27.196 |
| More than one-to-three | -1.097** | 0.170 | -61.253 | -0.917* | 0.124 | -44.518 | -1.812** | 0.715 | -100.604 |
| Caregiver service quality assurance（Hospital） | | | | | | | | | |
| Labor service company | -0.488* | 0.115 | -27.283 | -0.476* | 0.181 | -23.083 | -0.028 | 0.216 | -1.523 |
| Either hospital or labor service company | -0.197 | 0.126 | -10.987 | -0.250** | 0.113 | -12.148 | 0.284 | 0.308 | 15.748 |
| Hospital and labor  Service company | -0.357** | 0.159 | -19.924 | -0.379** | 0.124 | -18.387 | -0.242 | 0.465 | -13.410 |
| Form of information support（Face-to-face communication between nurses and patients） | | | | | | | | | |
| Paper materials | 0.204 | 0.121 | 11.376 | 0.016 | 0.163 | 0.755 | -0.776 | 0.225 | -4.305 |
| Video | 0.132 | 0.139 | 7.363 | -0.051 | 0.122 | -2.490 | -0.298 | 0.430 | -16.521 |
| Multimedia platform | 0.402** | 0.146 | 22.430 | 0.485* | 0.149 | 23.552 | 0.502 | 0.507 | 27.811 |
| Cost of self-paid  nursing assistants  (yuan/day) | -0.018* | 0.001 |  | -0.021* | 0.002 |  | -0.018* | 0.001 |  |
| Likelihood ratio test（LR chi2） | 274.590 |  |  | 483.450 |  |  | 102.130 |  |  |
| Log likelihood ratio（Loglikelihood） | -648.731 |  |  | -718.978 |  |  | -198.468 |  |  |
| Akaike Information  Criterion (AIC) | 141.3708 |  |  | 1148.635 |  |  | 412.277 |  |  |
| Bayesian Information Criterion (BIC) | 193.983 |  |  | 1285.062 |  |  | 485.545 |  |  |

Note:**p*<0.01，***p*<0.05

11）Effect of anxiety degree on supportive service choice preference of patients after radical resection of colorectal cancer（N=320）

| **Attribute and level**  **（Reference level）** | **No anxiety（n=192）** | | | Borderline anxiety**（n=88）** | | | Anxiety**（n=40）** | | |
| --- | --- | --- | --- | --- | --- | --- | --- | --- | --- |
| **β** | **SE** | **WTP** | **β** | **SE** | **WTP** | **β** | **SE** | **WTP** |
| Providers of basic nursing services（Nurse） | | | | | | | | | |
| Nursing assistant | -0.032 | 0.083 | -1.933 | 0.118 | 0.277 | 4.775 | -0.905 | 0.225 | -4.345 |
| Nurse and nursing assistant | -0.136 | 0.809 | -8.025 | -0.405** | 0.470 | -16.282 | -0.646** | 0.221 | -31.051 |
| Frequency of family visits（Once a day） | | | | | | | | | |
| Twice a day | 0.420* | 0.092 | 24.704 | 0.819** | 0.277 | 32.910 | 0.374 | 0.225 | 17.936 |
| More than twice a day | 0.715* | 0.121 | 42.058 | 1.396** | 0.470 | 56.095 | 0.739** | 0.261 | 35.486 |
| Duration of family visitation（Less than1 hour per time） | | | | | | | | | |
| 1 to 2 hours per time | 0.105 | 0.096 | 6.212 | 0.282 | 0.296 | 11.370 | 0.782* | 0.229 | 37.551 |
| More than 2 hours per time | 0.259* | 0.078 | 15.292 | 1.485* | 0.469 | 61.792 | 1.538* | 0.219 | 71.272 |
| Caregiver-to-patient ratio（One-to-one） | | | | | | | | | |
| One-to-two | -0.271** | 0.108 | -15.917 | -0.579 | 0.324 | -23.259 | -0.766 | 0.277 | -36.754 |
| One-to-three | -0.241** | 0.101 | -14.166 | -0.642** | 0.242 | -25.792 | -0.878** | 0.283 | -42.160 |
| More than one-to-three | -1.153* | 0.147 | -67.801 | -1.330** | 0.579 | -53.443 | -0.886** | 0.261 | -42.531 |
| Caregiver service quality assurance（Hospital） | | | | | | | | | |
| Labor service company | -0.267** | 0.090 | -15.717 | -0.771* | 0.174 | -30.984 | -0.772** | 0.261 | -37.042 |
| Either hospitals or labor service company | 0.041 | 0.102 | 2.430 | -0.448 | 0.234 | -18.000 | -0.711** | 0.256 | -34.152 |
| Hospital and labor service company | -0.154 | 0.131 | -9.086 | -1.004** | 0.382 | -40.333 | -0.452 | 0.329 | -21.706 |
| Form of information support（Face-to-face communication between nurses and patients） | | | | | | | | | |
| Paper materials | 0.018 | 0.095 | 1.050 | 0.091 | 0.190 | 3.642 | 0.478 | 0.283 | 22.941 |
| Video | -0.028 | 0.114 | -1.639 | -0.168 | 0.353 | -6.744 | 0.352 | 0.290 | 16.914 |
| Multimedia platform | 0.354** | 0.125 | 20.803 | 0.798 | 0.425 | 32.078 | 0.482 | 0.291 | 23.118 |
| Cost of self-paid  nursing assistants  (yuan/day) | -0.169* | 0.001 |  | -0.248* | 0.004 |  | -0.021* | 0.003 |  |
| Likelihood ratio test（LR chi2） | 384.760 |  |  | 172.540 |  |  | 172.540 |  |  |
| Log likelihood ratio（Loglikelihood） | -1005.378 |  |  | -163.262 |  |  | -163.262 |  |  |
| Akaike Information Criterion (AIC) | 2042.756 |  |  | 358.524 |  |  | 358.5241 |  |  |
| Bayesian Information Criterion (BIC) | 2141.122 |  |  | 431.792 |  |  | 431.792 |  |  |

Note:**p*<0.01，***p*<0.05

12）Effect of different depression degree on supportive service preference of patients after radical resection of colorectal cancer（N=320）

| **Attribute and level**  **（Reference level）** | **No depression（n=221）** | | | **Borderline depression（n=70）** | | | **Depression（n=29）** | | |
| --- | --- | --- | --- | --- | --- | --- | --- | --- | --- |
| **β** | **SE** | **WTP** | **β** | **SE** | **WTP** | **β** | **SE** | **WTP** |
| Providers of basic nursing services（Nurse） | | | | | | | | | |
| Nursing assistant | -0.076 | 0.077 | -4.208 | 0.119 | 0.167 | 4.775 | -0.088 | 0.265 | -3.823 |
| Nurse and nursing assistant | -0.324* | 0.078 | -17.880 | -0.405** | 0.187 | -16.282 | -0.833** | 0.285 | -36.156 |
| Frequency of family visits（Once a day） | | |  |  |  |  |  |  |  |
| Twice a day | 0.406* | 0.090 | 22.397 | 0.819** | 0.277 | 32.910 | 0.267 | 0.263 | 11.601 |
| More than twice a day | 0.773 * | 0.123 | 42.652 | 1.396** | 0.470 | 56.095 | 0.373 | 0.311 | 16.191 |
| Duration of family visitation（Less than1 hour per time） | | | | | | | | | |
| 1 to 2 hours per time | 0.293** | 0.950 | 16.188 | 0.283 | 0.296 | 11.370 | 0.741** | 0.293 | 32.194 |
| More than 2 hours per time | 0.546* | 0.752 | 30.143 | 1.422* | 0.157 | 61.792 | 1.538* | 0.248 | 61.846 |
| Caregiver-to-patient ratio（One-to-one） | | | | | | | | | |
| One-to-two | -0.255** | 0.104 | -14.047 | -0.579* | 0.324 | -23.259 | -0.773** | 0.320 | -33.558 |
| One-to-three | -0.280** | 0.096 | -15.431 | -0.642 | 0.242 | -25.792 | -1.005** | 0.350 | -43.630 |
| More than one-to-three | -1.032 * | 0.147 | -56.933 | -1.330* | 0.579 | -53.443 | -0.749** | 0.346 | -32.515 |
| Caregiver service quality assurance（Hospital） | | | | | | | | | |
| Labor service company | -0.319* | 0.085 | -17.630 | -0.771 | 0.174 | -30.984 | -0.679** | 0.330 | -29.469 |
| Either hospital or labor service company | -0.147 | 0.098 | -8.129 | -0.448* | 0.234 | -18.000 | -0.659** | 0.314 | -28.586 |
| Hospital and labor service company | -0.365** | 0.129 | -20.130 | -1.004 | 0.382 | -40.333 | -0.415 | 0.436 | -18.016 |
| Form of information support（Face-to-face communication between nurses and patients） | | | | | | | | | |
| Paper materials | 0.106 | 0.090 | 5.851 | 0.091 | 0.190 | 3.642 | 0.673 | 0.358 | 29.204 |
| Video | -0.050 | 0.112 | -2.773 | -0.168 | 0.353 | -6.744 | 0.392 | 0.341 | 17.003 |
| Multimedia platform | 0.518* | 0.124 | 28.598 | 0.798 | 0.425 | 32.078 | 0.346 | 0.336 | 15.033 |
| Cost of self-paid nursing assistants(yuan/day) | -0.018* | 0.001 |  | -0.249* | 0.004 |  | -0.230* | 0.004 |  |
| Likelihood ratio test  （LR chi2） | 468.190 |  |  | 369.260 |  |  | 128.360 |  |  |
| Log likelihood ratio  （Log likelihood） | -1144.574 |  |  | -364.344 |  |  | -116.729 |  |  |
| Akaike Information Criterion (AIC) | 2321.148 |  |  | 622.625 |  |  | 265.458 |  |  |
| Bayesian Information  Criterion (BIC) | 2421.765 |  |  | 704.847 |  |  | 333.581 |  |  |

Note:**p*<0.01，***p*<0.05

1. Influence of social support on supportive service choice preference of patients undergoing radical surgery for colorectal cancer（N=320）

| **Attribute and level**  **（Reference level）** | | **Moderate-level social support（n=249）** | | | **High-level social support（n=71）** | | |
| --- | --- | --- | --- | --- | --- | --- | --- |
| **β** | **SE** | **WTP** | **β** | **SE** | **WTP** |
| Providers of basic nursing services（Nurse） | | | | | | | |
| Nursing assistant | | 0.035 | 0.076 | 3.790 | -0.131 | 0.133 | -9.666 |
| Nurse and nursing assistant | -0.283* | 0.077 | -12.747 | -0.108 | 0.130 | -7.958 |
| Frequency of family visits（Once a day） | | | | | | |
| Twice a day | 0.509* | 0.089 | 45.186 | 0.399* | 0.141 | 29.357 |
| More than twice a day | 0.856* | 0.123 | 78.347 | 0.701* | 0.171 | 51.555 |
| Duration of family visitation（Less than1 hour per time） | | | | | | |
| 1 to 2 hours per time | 0.197** | 0.094 | 4.309 | 0.476* | 0.149 | 17.305 |
| More than 2 hours per time | 0.753* | 0.730 | 40.027 | 0.544* | 0.130 | 34.995 |
| Caregiver-to-patient ratio（One-to-one） | | | | | | |
| One-to-two | -0.426* | 0.107 | -23.411 | -0.254 | 0.167 | -18.698 |
| One-to-three | -0.404* | 0.096 | -27.197 | -0.293 | 0.163 | -21.528 |
| More than one-to-three | -1.600* | 0.148 | -100.605 | -1.187* | 0.206 | -87.285 |
| Caregiver service quality assurance（Hospital） | | | | | | |
| Labor service company | -0.409* | 0.084 | -1.524 | -0.508* | 0.152 | -37.366 |
| Either hospital or labor service company | -0.168 | 0.094 | 15.749 | -0.125* | 0.161 | -9.183 |
| Hospital and labor service company | -0.035** | 0.127 | -13.411 | -0.331* | 0.199 | -24.367 |
| Form of information support（Face-to-face communication between nurses and patients） | | | | | | |
| Paper materials | 0.082 | 0.090 | -4.305 | 0.085* | 0.154 | 6.246 |
| Video | 0.034 | 0.112 | -16.522 | 0.010* | 0.171 | 0.763 |
| Multimedia platform | 0.430* | 0.123 | 27.812 | 0.480** | 0.189 | 35.277 |
| Cost of self-paid nursing assistants  (yuan/day) | -0.019* | 0.001 |  | -0.014* | 0.002 |  |
| Likelihood ratio test（LR chi2） | 646.080 |  |  | 144.340 |  |  |
| Log likelihood ratio（Loglikelihood） | -1230.304 |  |  | -370.749 |  |  |
| Akaike Information Criterion (AIC) | 1189.751 |  |  | 736.135 |  |  |
| Bayesian Information Criterion (BIC) | 1263.324 |  |  | 808.009 |  |  |

Note:**p*<0.01，***p*<0.05
